# Supplementary material
Source: MDPI journal article supplement (https://www.mdpi.com/search?q=data-04-00041)
Supplement: s001 [file data-04-00041-s001.pdf]

**Table S1.** 32 Core ET-SCI indices (Source: [9]). Bold indicates index is also an ETCCDI index. (TX: daily maximum near-surface air temperature, TN: daily minimum near-surface air temperature, PR: daily near-surface total precipitation, H: Health, AFS: Agriculture and Food Security, WRH: Water Resources and Hydrology).

| Short Name  | Long Name                      | Definition                                                                                                                                                                          | Plain Language Description                                                                     | Units              | Time Scale | Sector(s)   |
|-------------|--------------------------------|-------------------------------------------------------------------------------------------------------------------------------------------------------------------------------------|------------------------------------------------------------------------------------------------|--------------------|------------|-------------|
| <b>FD</b>   | Frost Days                     | Number of days when $TN < 0^{\circ}\text{C}$                                                                                                                                        | Days when minimum temperature is below $0^{\circ}\text{C}$                                     | days               | Mon/Ann    | H, AFS      |
| TNlt2       | TN below $2^{\circ}\text{C}$   | Number of days when $TN < 2^{\circ}\text{C}$                                                                                                                                        | Days when minimum temperature is below $2^{\circ}\text{C}$                                     | days               | Mon/Ann    | AFS         |
| TNltm2      | TN below $-2^{\circ}\text{C}$  | Number of days when $TN < -2^{\circ}\text{C}$                                                                                                                                       | Days when minimum temperature is below $-2^{\circ}\text{C}$                                    | days               | Mon/Ann    | AFS         |
| TNltm20     | TN below $-20^{\circ}\text{C}$ | Number of days when $TN < -20^{\circ}\text{C}$                                                                                                                                      | Days when minimum temperature is below $-20^{\circ}\text{C}$                                   | days               | Mon/Ann    | H, AFS      |
| <b>ID</b>   | Ice Days                       | Number of days when $TX < 0^{\circ}\text{C}$                                                                                                                                        | Days when maximum temperature is below $0^{\circ}\text{C}$                                     | days               | Mon/Ann    | H, AFS      |
| <b>SU</b>   | Summer days                    | Number of days when $TX > 25^{\circ}\text{C}$                                                                                                                                       | Days when maximum temperature exceeds $25^{\circ}\text{C}$                                     | days               | Mon/Ann    | H           |
| <b>TR</b>   | Tropical nights                | Number of days when $TN > 20^{\circ}\text{C}$                                                                                                                                       | Days when minimum temperature exceeds $20^{\circ}\text{C}$                                     | days               | Mon/Ann    | H, AFS      |
| <b>GSL</b>  | Growing Season Length          | Annual number of days between the first occurrence of 6 consecutive days with $TM > 5^{\circ}\text{C}$ and the first occurrence of 6 consecutive days with $TM < 5^{\circ}\text{C}$ | Length of time in which plants can grow                                                        | days               | Ann        | AFS         |
| <b>TXx</b>  | Max TX                         | Warmest daily TX                                                                                                                                                                    | Hottest day                                                                                    | $^{\circ}\text{C}$ | Mon/Ann    | AFS         |
| <b>TNn</b>  | Min TN                         | Coldest daily TN                                                                                                                                                                    | Coldest night                                                                                  | $^{\circ}\text{C}$ | Mon/Ann    | AFS         |
| <b>WSDI</b> | Warm spell duration indicator  | Annual number of days contributing to events where 6 or more consecutive days experience $TX > 90\text{th percentile}$                                                              | Number of days contributing to a warm period (where the period has to be at least 6 days long) | days               | Ann        | H, AFS, WRH |
| WSDId       | User-defined WSDI              | Annual number of days contributing to events where $d$ or more consecutive days experience $TX > 90\text{th percentile}$                                                            | Number of days contributing to a warm period (where the minimum length is user-specified )     | days               | Ann        | H, AFS, WRH |
| <b>CSDI</b> | Cold spell duration indicator  | Annual number of days contributing to events where 6 or more consecutive days experience $TN < 10\text{th percentile}$                                                              | Number of days contributing to a cold period (where the period has to be at least 6 days long) | days               | Ann        | H, AFS      |

|          |                                                        |                                                                                                                               |                                                                                            |             |         |             |
|----------|--------------------------------------------------------|-------------------------------------------------------------------------------------------------------------------------------|--------------------------------------------------------------------------------------------|-------------|---------|-------------|
| CSDId    | User-defined CSDI                                      | Annual number of days contributing to events where $d$ or more consecutive days experience $TN < 10$ th percentile            | Number of days contributing to a cold period (where the minimum length is user-specified ) | days        | Ann     | H, AFS, WRH |
| TXgt50p  | Fraction of days with above average temperature        | Percentage of days where $TX > 50$ th percentile                                                                              | Fraction of days with above average temperature                                            | %           | Mon/Ann | H, AFS, WRH |
| TX95t    | Very warm day threshold                                | Value of 95th percentile of TX                                                                                                | A threshold where days above this temperature would be classified as very warm             | °C          | Daily   | H, AFS      |
| TMge5    | TM of at least 5°C                                     | Number of days when $TM \geq 5$ °C                                                                                            | Days when average temperature is at least 5 °C                                             | days        | Mon/Ann | AFS         |
| TMlt5    | TM below 5°C                                           | Number of days when $TM < 5$ °C                                                                                               | Days when average temperature is below 5 °C                                                | days        | Mon/Ann | AFS         |
| TMge10   | TM of at least 10°C                                    | Number of days when $TM \geq 10$ °C                                                                                           | Days when average temperature is at least 10 °C                                            | days        | Mon/Ann | AFS         |
| TMlt10   | TM below 10°C                                          | Number of days when $TM < 10$ °C                                                                                              | Days when average temperature is below 10 °C                                               | days        | Mon/Ann | AFS         |
| TXge30   | TX of at least 30°C                                    | Number of days when $TX \geq 30$ °C                                                                                           | Days when maximum temperature is at least 30 °C                                            | days        | Mon/Ann | H, AFS      |
| TXge35   | TX of at least 35°C                                    | Number of days when $TX \geq 35$ °C                                                                                           | Days when maximum temperature is at least 35°C                                             | days        | Mon/Ann | H, AFS      |
| TXdTNd   | User-defined consecutive number of hot days and nights | Annual count of $d$ consecutive days where both $TX > 95$ th percentile and $TN > 95$ th percentile, where $10 \geq d \geq 2$ | Total consecutive hot days and hot nights (where consecutive periods are user-specified)   | events      | Ann     | H, AFS, WRH |
| GDDgrown | Growing Degree Days                                    | Annual sum of $TM - n$ (where $n$ is a user-defined location-specific base temperature and $TM > n$ )                         | A measure of heat accumulation to predict plant and animal developmental rates             | degree-days | Ann     | H, AFS      |
| CDD      | Consecutive Dry Days                                   | Maximum number of consecutive dry days (when $PR < 1.0$ mm)                                                                   | Longest dry spell                                                                          | days        | Mon/Ann | H, AFS, WRH |
| R20mm    | Number of very heavy rain days                         | Number of days when $PR \geq 20$ mm                                                                                           | Days when rainfall is at least 20 mm                                                       | days        | Mon/Ann | AFS, WRH    |
| PRCPTOT  | Annual total wet-day PR                                | Sum of daily $PR \geq 1.0$ mm                                                                                                 | Total wet-day rainfall                                                                     | mm          | Mon/Ann | AFS, WRH    |
| R95pTOT  | Contribution from very wet days                        | $100 \cdot r_{95p} / PRCPTOT$                                                                                                 | Fraction of total wet-day rainfall that comes from very wet days                           | %           | Ann     | AFS, WRH    |
| R99pTOT  | Contribution from extremely wet days                   | $100 \cdot r_{99p} / PRCPTOT$                                                                                                 | Fraction of total wet-day rainfall that comes from extremely wet days                      | %           | Ann     | AFS, WRH    |

|        |                                                     |                                                                                                                                                                                |                                                                 |          |         |             |
|--------|-----------------------------------------------------|--------------------------------------------------------------------------------------------------------------------------------------------------------------------------------|-----------------------------------------------------------------|----------|---------|-------------|
| RXdday | User-defined consecutive days PR amount             | Maximum $d$ -day PR total                                                                                                                                                      | Maximum amount of rain that falls in a user-specified period    | mm       | Mon/Ann | H, AFS, WRH |
| SPI    | Standardised Precipitation Index                    | Measure of “drought” using the Standardised Precipitation Index on time scales of 3, 6, 12, 24, 36 and 48 months. Calculated using the R SPEI package [17].                    | A drought measure specified as a precipitation deficit          | unitless | Custom  | H, AFS, WRH |
| SPEI   | Standardised Precipitation Evapotranspiration Index | Measure of “drought” using the Standardised Precipitation Evapotranspiration Index on time scales of 3, 6, 12, 24, 36 and 48 months. Calculated using the R SPEI package [17]. | A drought measure specified using precipitation and evaporation | unitless | Custom  | H, AFS, WRH |

**Table S2.** 39 non-core ET-SCI indices (Source: [9]). Bold indicates index is also an ETCCDI index. Sectoral abbreviations same as in Table S1.

| Short Name   | Long Name                                               | Definition                                                                                                             | Plain Language Description                                                                 | Units  | Time Scale | Sector(s)   |
|--------------|---------------------------------------------------------|------------------------------------------------------------------------------------------------------------------------|--------------------------------------------------------------------------------------------|--------|------------|-------------|
| TXbdTNbd     | User-defined consecutive number of cold days and nights | Annual number of $d$ consecutive days where both TX < 5th percentile and TN < 5th percentile, where $10 \geq d \geq 2$ | Total consecutive cold days and cold nights (where consecutive periods are user-specified) | events | Ann        | H, AFS, WRH |
| <b>DTR</b>   | Daily Temperature Range                                 | Mean difference between daily TX and daily TN                                                                          | Average range of maximum and minimum temperature                                           | °C     | Mon/Ann    |             |
| TNx          | Max TN                                                  | Warmest daily TN                                                                                                       | Hottest night                                                                              | °C     | Mon/Ann    |             |
| TXn          | Min TX                                                  | Coldest daily TX                                                                                                       | Coldest day                                                                                | °C     | Mon/Ann    |             |
| TMm          | Mean TM                                                 | Mean daily mean temperature                                                                                            | Average daily temperature                                                                  | °C     | Mon/Ann    |             |
| TXm          | Mean TX                                                 | Mean daily maximum temperature                                                                                         | Average daily maximum temperature                                                          | °C     | Mon/Ann    |             |
| TNm          | Mean TN                                                 | Mean daily minimum temperature                                                                                         | Average daily minimum temperature                                                          | °C     | Mon/Ann    |             |
| <b>TX10p</b> | Amount of cool days                                     | Percentage of days when TX < 10th percentile                                                                           | Fraction of days with cool day time temperatures                                           | %      | Ann        |             |
| <b>TX90p</b> | Amount of hot days                                      | Percentage of days when TX > 90th percentile                                                                           | Fraction of days with hot day time temperatures                                            | %      | Ann        |             |
| <b>TN10p</b> | Amount of cold nights                                   | Percentage of days when TN < 10th percentile                                                                           | Fraction of days with cold night time temperatures                                         | %      | Ann        |             |
| <b>TN90p</b> | Amount of warm nights                                   | Percentage of days when TN > 90th percentile                                                                           | Fraction of days with warm night time temperatures                                         | %      | Ann        |             |
| <b>CWD</b>   | Consecutive Wet Days                                    | Maximum annual number of consecutive wet days (when PR $\geq$ 1.0 mm)                                                  | The longest wet spell                                                                      | days   | Ann        |             |
| <b>R10mm</b> | Number of heavy rain days                               | Number of days when PR $\geq$ 10 mm                                                                                    | Days when rainfall is at least 10mm                                                        | days   | Mon/Ann    |             |

|                        |                                                                                                                                |                                                                                                                                                                                                                                                                                                                                                                                                  |                                                              |                              |         |             |
|------------------------|--------------------------------------------------------------------------------------------------------------------------------|--------------------------------------------------------------------------------------------------------------------------------------------------------------------------------------------------------------------------------------------------------------------------------------------------------------------------------------------------------------------------------------------------|--------------------------------------------------------------|------------------------------|---------|-------------|
| <b>Rnnmm</b>           | Number of customised rain days                                                                                                 | Number of days when PR $\geq mm$                                                                                                                                                                                                                                                                                                                                                                 | Days when rainfall is at least a user-specified number of mm | days                         | Mon/Ann |             |
| <b>SDII</b>            | Daily PR intensity                                                                                                             | Annual total PR divided by the number of wet days (when total PR $\geq 1.0$ mm)                                                                                                                                                                                                                                                                                                                  | Average daily wet-day rainfall intensity                     | mm/day                       | Ann     |             |
| <b>R95p</b>            | Total annual PR from heavy rain days                                                                                           | Annual sum of daily PR $> 95$ th percentile                                                                                                                                                                                                                                                                                                                                                      | Amount of rainfall from very wet days                        | mm                           | Ann     |             |
| <b>R99p</b>            | Total annual PR from very heavy rain days                                                                                      | Annual sum of daily PR $> 99$ th percentile                                                                                                                                                                                                                                                                                                                                                      | Amount of rainfall from extremely wet days                   | mm                           | Ann     |             |
| <b>Rx1day</b>          | Max 1-day PR                                                                                                                   | Maximum 1-day PR total                                                                                                                                                                                                                                                                                                                                                                           | Maximum amount of rain that falls in one day                 | mm                           | Mon/Ann |             |
| <b>Rx5day</b>          | Max 5-day PR                                                                                                                   | Maximum 5-day PR total                                                                                                                                                                                                                                                                                                                                                                           | Maximum amount of rain that falls in five consecutive days   | mm                           | Mon/Ann |             |
| HWN<br>(EHF/Tx90/Tn90) | Heatwave number (HWN) as defined by either the Excess Heat Factor (EHF), 90th percentile of TX or the 90th percentile of TN    | The number of individual heatwaves that occur each summer (Nov–Mar in southern hemisphere and May–Sep in northern hemisphere). A heatwave is defined as 3 or more days where either the EHF is positive, TX $> 90^{\text{th}}$ percentile of TX or where TN $> 90^{\text{th}}$ percentile of TN. Where percentiles are calculated from base period specified by user. See [31] for more details. | Number of individual heatwaves                               | events                       | Ann     | H, AFS, WRH |
| HWF<br>(EHF/Tx90/Tn90) | Heatwave frequency (HWF) as defined by either the Excess Heat Factor (EHF), 90th percentile of TX or the 90th percentile of TN | The number of days that contribute to heatwaves as identified by HWN. See [31] for more details.                                                                                                                                                                                                                                                                                                 | Total number of days that contribute to individual heatwaves | days                         | Ann     | H, AFS, WRH |
| HWD<br>(EHF/Tx90/Tn90) | Heatwave duration (HWD) as defined by either the Excess Heat Factor (EHF), 90th percentile of TX or the 90th percentile of TN  | The length of the longest heatwave identified by HWN. See [31] for more details.                                                                                                                                                                                                                                                                                                                 | Length of the longest heatwave                               | days                         | Ann     | H, AFS, WRH |
| HWM<br>(EHF/Tx90/Tn90) | Heatwave magnitude (HWM) as defined by either the Excess Heat Factor (EHF), 90th percentile of TX or the 90th percentile of TN | The mean temperature of all heatwaves identified by HWN. See [31] for more details.                                                                                                                                                                                                                                                                                                              | Average temperature across all individual heatwaves          | °C (°C <sup>2</sup> for EHF) | Ann     | H, AFS, WRH |

|                        |                                                                                                                                |                                                                                                                                    |                                                              |                              |     |             |
|------------------------|--------------------------------------------------------------------------------------------------------------------------------|------------------------------------------------------------------------------------------------------------------------------------|--------------------------------------------------------------|------------------------------|-----|-------------|
| HWA<br>(EHF/Tx90/Tn90) | Heatwave amplitude (HWA) as defined by either the Excess Heat Factor (EHF), 90th percentile of TX or the 90th percentile of TN | The peak daily value in the hottest heatwave (defined as the heatwave with highest HWM).<br>[31] for more details.                 | Hottest day of the hottest heatwave                          | °C (°C <sup>2</sup> for EHF) | Ann | H, AFS, WRH |
| CWN_ECF                | Coldwave number (CWN) as defined by the Excess Cold Factor (ECF).                                                              | The number of individual ‘coldwaves’ that occur each year.<br>See [32] for more information.                                       | Number of individual coldwaves                               | events                       | Ann | H, AFS, WRH |
| CWF_ECF                | Coldwave frequency (CWF) as defined by the Excess Cold Factor (ECF).                                                           | The number of days that contribute to ‘coldwaves’ as identified by ECF_HWN.<br>See [32] for more information.                      | Total number of days that contribute to individual coldwaves | days                         | Ann | H, AFS, WRH |
| CWD_ECF                | Coldwave duration (CWD) as defined by the Excess Cold Factor (ECF).                                                            | The length of the longest ‘coldwave’ identified by ECF_HWN.<br>See [32] for more information.                                      | Length of the longest coldwave                               | days                         | Ann | H, AFS, WRH |
| CWM_ECF                | Coldwave magnitude (CWM) as defined by the Excess Cold Factor (ECF).                                                           | The mean temperature of all ‘coldwaves’ identified by ECF_HWN.<br>See [32] for more information.                                   | Average temperature across all individual coldwaves          | °C <sup>2</sup>              | Ann | H, AFS, WRH |
| CWA_ECF                | Coldwave amplitude (CWA) as defined by the Excess Cold Factor (ECF).                                                           | The minimum daily value in the coldest ‘coldwave’ (defined as the coldwave with lowest ECF_HWM).<br>See [32] for more information. | Coldest day of the coldest coldwave                          | °C <sup>2</sup>              | Ann | H, AFS, WRH |
